# Supplementary material for: Cytoskeleton Dependent Mobility Dynamics of FcγRIIA Facilitates Platelet Haptotaxis and Capture of Opsonized Bacteria
Source: MDPI journal article supplement (doi:10.3390/cells11101615), 2022-05-11
Supplement: s1 [file s1]

## Supplementary Information—Videos

# Cytoskeleton Dependent Mobility Dynamics of Fc $\gamma$ RIIA Facilitates Platelet Haptotaxis and Capture of Opsonized Bacteria

Raghavendra Palankar \*, Laura Sachs, Jan Wesche and Andreas Greinacher

Affiliations: Institute for Immunology and Transfusion Medicine, University Medicine Greifswald, 17489 Greifswald, Germany

\* Correspondence: author: raghavendra.palankar@med.uni-greifswald.de.

### Contents:

**Video S1.** Control platelet adhesion and haptotaxis on Agg.IgG micropatterns (inter pattern pitch 1  $\mu$ m) showing filopodial and lamellipodial extensions. Platelets are loaded with calcium indicator dye Fluo-4 AM to show changes in calcium release during adhesion and spreading. Playback at 5 fps.

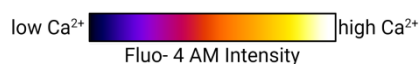

Look-up-table for intracellular Fluo-4 AM intensity

**Video S2.** Carrier Control (DMSO 0.05%) showing platelet adhesion and haptotaxis on Agg.IgG micropatterns (inter pattern pitch 1  $\mu$ m) showing filopodial and lamellipodial extensions. Platelets are loaded with calcium indicator dye Fluo-4 AM to show changes in calcium release during adhesion and spreading. Playback at 5 fps.

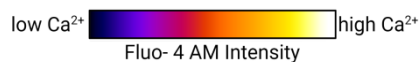

Look-up-table for intracellular Fluo-4 AM intensity

**Video S3.** Cytochalasin D (25  $\mu$ M) treated platelets fail to adhere firmly and do not spread on Agg.IgG micropatterns (inter pattern pitch 1  $\mu$ m). Platelets are loaded with calcium indicator dye Fluo-4 AM and do not show significant changes in calcium release during adhesion and spreading compared to control and DMSO-treated platelets. Playback at 5 fps.



Look-up-table for intracellular Fluo-4 AM intensity

**Video S4.** Blebbistatin (10  $\mu$ M) treated platelets adhere weakly and do not spread on Agg.IgG micropatterns (inter pattern pitch 1  $\mu$ m). Platelets are loaded with calcium indicator dye Fluo-4 AM and do not show significant changes in calcium release during adhesion and spreading compared to control and DMSO-treated platelets. Playback at 5 fps.

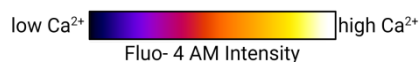

Look-up-table for intracellular Fluo-4 AM intensity

**Video S5, S6, and S7.** Tracking dynamics of Fc $\gamma$ RIIA via QD-Fab on platelet filopodia, lamellipodia, and body (corresponding to Image 5B). Legends-magenta circles indicate the localization of individual QD luminescence, and yellow lines represent their computed tracks. Image interval of 78 ms, and playback is at 5 fps.
