# Supplementary material for: Cytoskeleton Dependent Mobility Dynamics of FcγRIIA Facilitates Platelet Haptotaxis and Capture of Opsonized Bacteria
Source: MDPI journal article supplement (doi:10.3390/cells11101615), 2022-05-11
Supplement: s1 [file s1]

## **Supplementary Information—Figures**

# **Cytoskeleton Dependent Mobility Dynamics of Fc $\gamma$ RIIA Facilitates Platelet Haptotaxis and Capture of Opsonized Bacteria**

**Raghavendra Palankar \*, Laura Sachs, Jan Wesche and Andreas Greinacher**

Affiliations: Institute for Immunology and Transfusion Medicine, University Medicine Greifswald, 17489 Greifswald, Germany

\* Correspondence: author: raghavendra.palankar@med.uni-greifswald.de.

### **Contents:**

**Supplementary Figure S1.** Schematics of micropatterned array functionalized with Agg-IgG used for platelet adhesion and spreading assays.

**Supplementary Figure S2.** Optimization of electron beam dosage for preparation of high-fidelity micropatterns.

**Supplementary Figure S3.** Line profiles along the fluorescent micropatterns.

**Supplementary Figure S4.** Characterization of quantum dots (QD) by dynamic light scattering (DLS).

**Supplementary Figure S5.** Confocal fluorescence microscopy of specific labeling of Fc $\gamma$ RIIA on platelets by QD-Fab.

**Supplementary Figure S6.** Representative images of individual tracks and trajectories of QD-Fab bound to platelet Fc $\gamma$ RIIA.

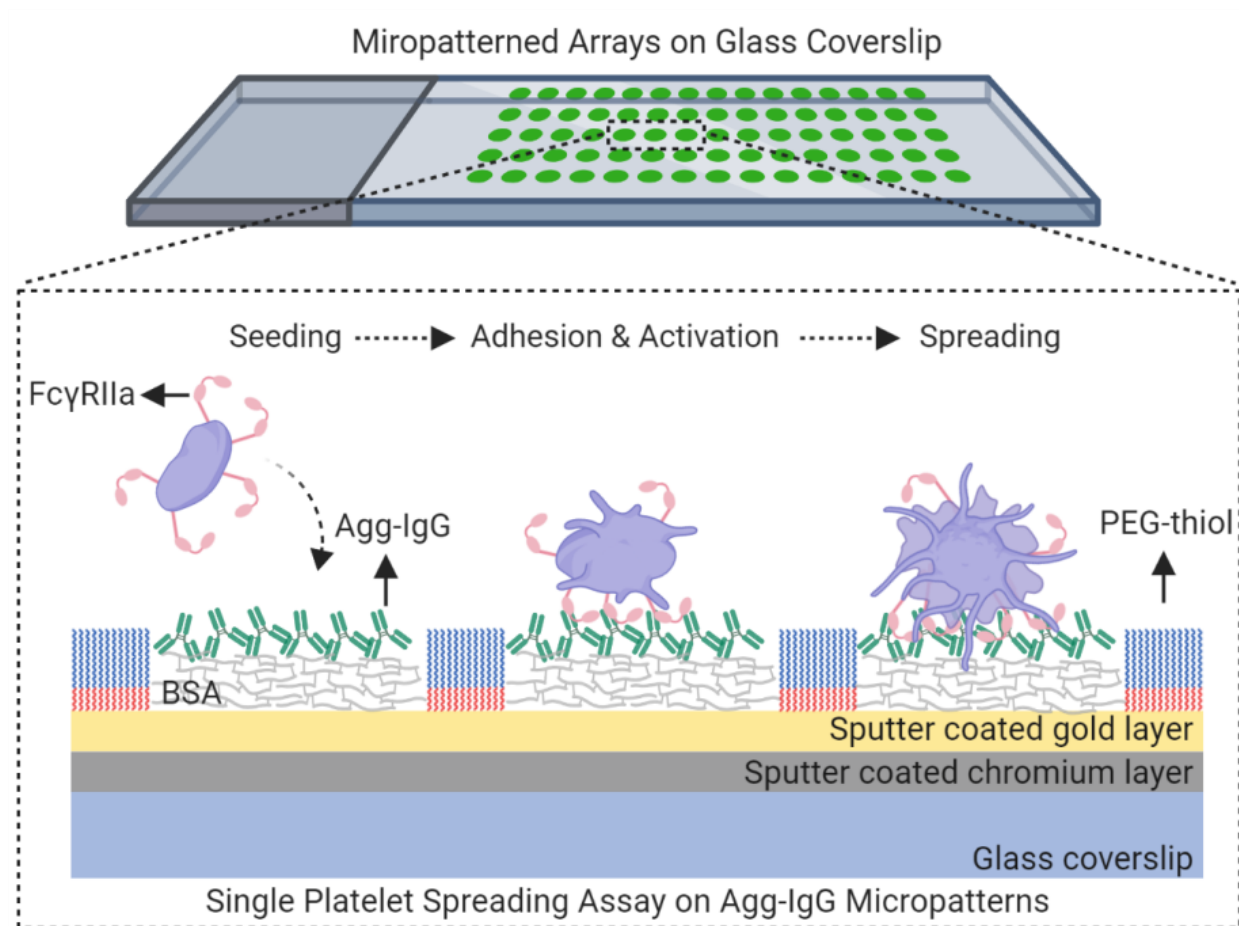

**Supplementary Figure S1.** Schematics of micropatterned array functionalized with Agg-IgG used for platelet adhesion and spreading assays. Micropatterned arrays were prepared using electron beam lithography on a glass coverslip sputter-coated with chromium and gold layers. The spin-coated layer of BSA was crosslinked to the gold interface utilizing an electron beam in defined micropatterns. Agg-IgG was bioconjugated to BSA, while thiolated PEG was used as a non-adhesive area that separated the micropatterns. Figure prepared with Biorender.com

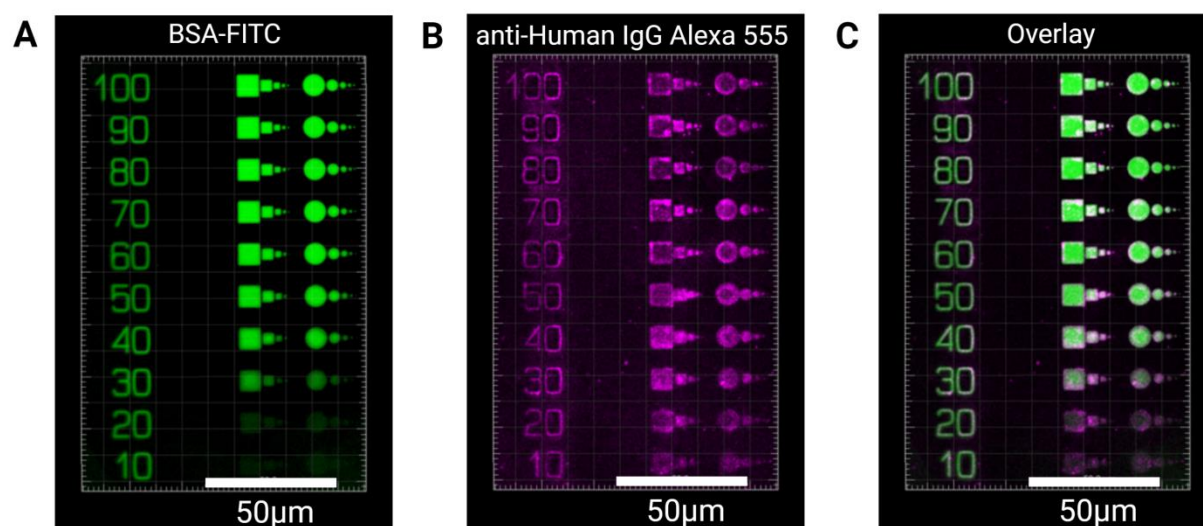

**Supplementary Figure S2.** Optimization of electron beam dosage for preparation of high-fidelity micropatterns. Confocal fluorescence microscopy of the impact of electron beam dosage ( from 10 to 100  $\mu\text{C}/\text{cm}^2$ ) on the fidelity and biofunctionalization of Agg-IgG (detected with anti-Human IgG Alexa 555).

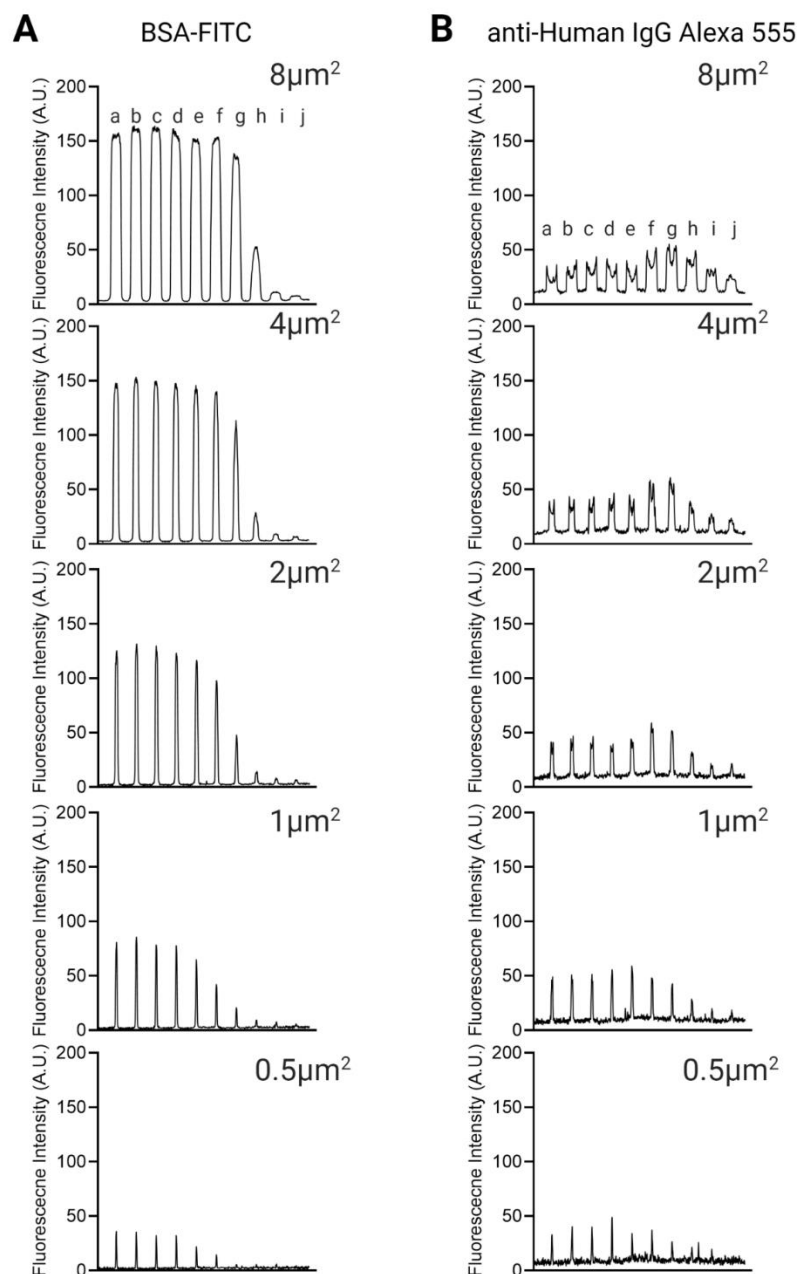

**Supplementary Figure S3.** Line profiles along the micropatterns prepared at different electron beam dosages ( a = 100  $\mu\text{C}/\text{cm}^2$  - targets dose and j = 10  $\mu\text{C}/\text{cm}^2$  - lowest dose) show the impact micropattern fidelity as shown by fluorescence intensities (A.U) of BSA-FITC and Agg-IgG detected by anti-human IgG Alexa 555.

## A Particle Size Distribution

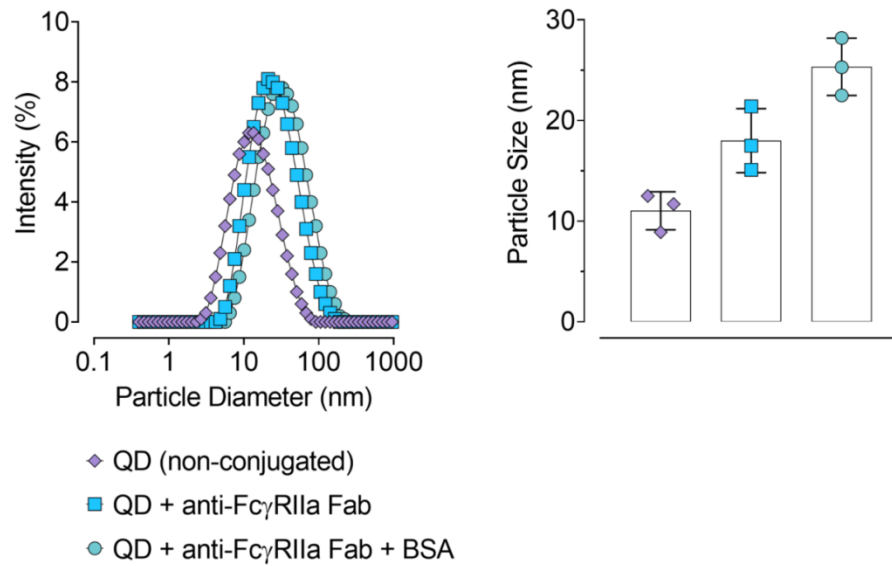

## B Zeta Potential ( $\zeta$ )

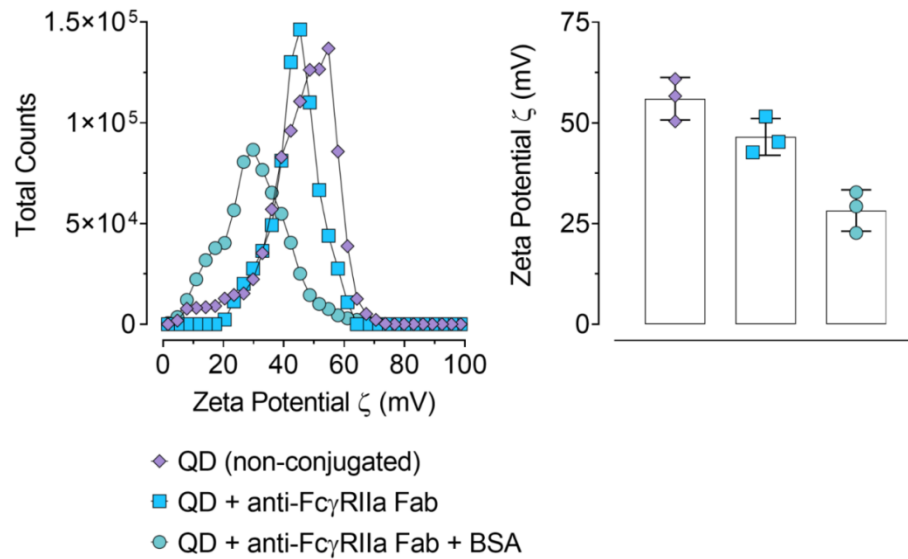

**Supplementary Figure S4.** Characterization of quantum dots (QD) by dynamic light scattering (DLS). Particle size (**A**) and surface zeta potential (**B**) of QD-Fab used for single-particle tracking of Fc $\gamma$ RIIA on platelets showing changes in their physicochemical characteristics at different stages of functionalization.

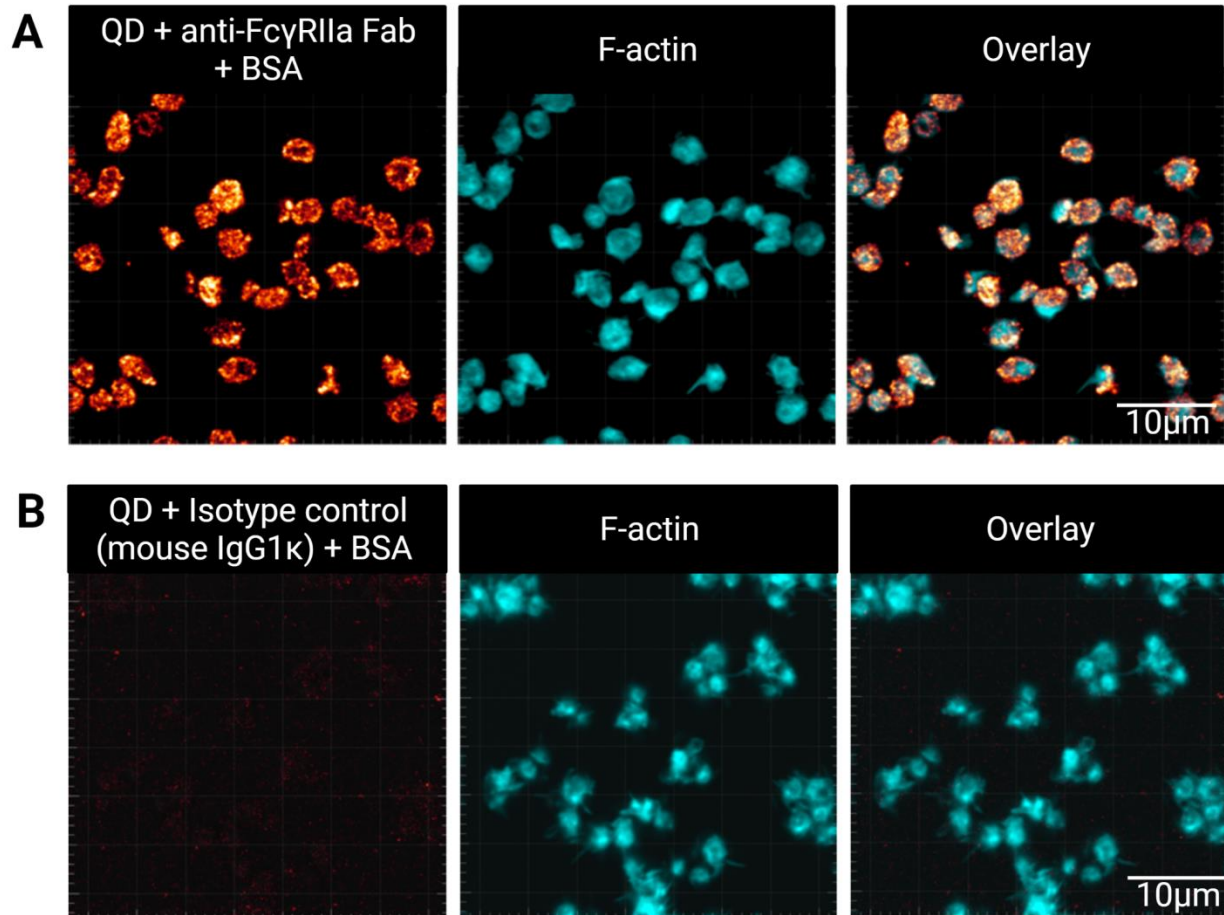

**Supplementary Figure S5.** Confocal fluorescence microscopy of specific labeling of FcγRIIA on platelets by QD-Fab (**A**) in comparison to the isotype control (**B**). Note: Phalloidin was used as a counter stain to visualize platelet F-actin.

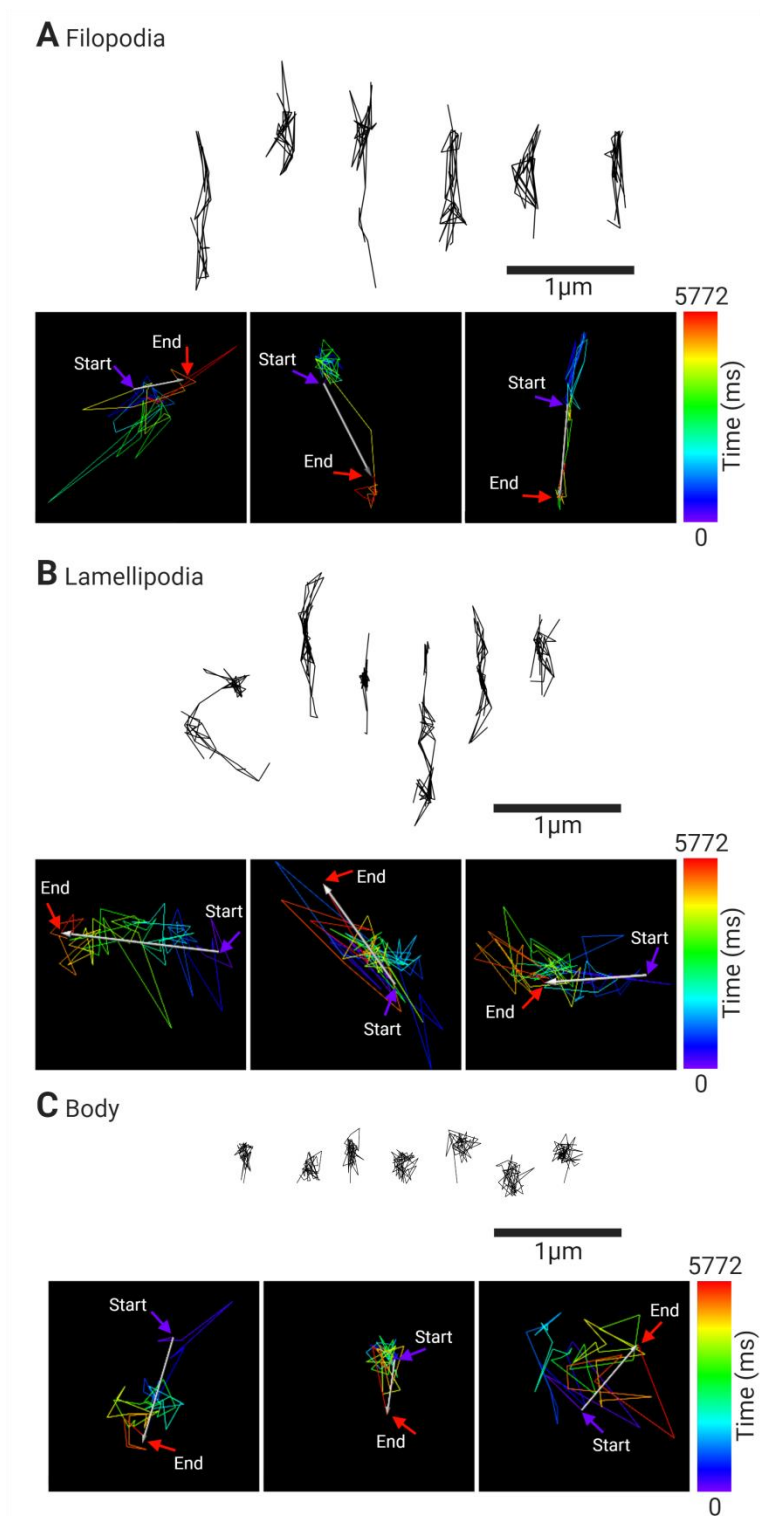

**Supplementary Figure S6.** Representative images of individual tracks and trajectories of QD-Fab bound to platelet Fc $\gamma$ RIIA on filopodia (A), lamellipodia (B), and platelet body (C) showing differences in track lengths and QD-Fab displacement as a function of time.
