# Supplementary material for: Cytoskeleton Dependent Mobility Dynamics of FcγRIIA Facilitates Platelet Haptotaxis and Capture of Opsonized Bacteria
Source: Cells. 2022 May 11;11(10):1615. doi: 10.3390/cells11101615 (PMC9139458; doi:10.3390/cells11101615)
Supplement: Supplementary file 1 [file cells-11-01615-s001.zip]

Archive with 9 entries (9 files):
- Supplementary Information for Cells Supplementary Figures S1 through S6.pdf
- Supplementary Information for Cells Videos S1 thorugh S7.pdf
- Supplementary Video S1.avi
- Supplementary Video S2.avi
- Supplementary Video S3.avi
- Supplementary Video S4.avi
- Supplementary Video S5.avi
- Supplementary Video S6.avi
- Supplementary Video S7.avi
